# Supplementary material
Source: publisher figshare collection journal article supplement (https://acs.figshare.com/ndownloader/files/4133782)
Supplement: Supplementary file 1 [file 4133782]

#\#CIF_1.1
 
#  CIF produced by WinGX routine CIF_UPDATE
#  Created on 2012-05-24 at 13:44:11
#  Using CIFtbx version 2.6.2 16 Jun 1998
 
#  Dictionary name : cif_core.dic
#  Dictionary vers : 2.4
#  Request file    : h:\monocristal\wingx\files\archive.reqdat
#  CIF files read  : lm06ja1n struct
 
#------------------ SECTION 1. GLOBAL INFORMATION ---------------------------#
 
data_global
 
#------------------ AUDIT DETAILS -------------------------------------------#
 
_audit_creation_date            2012-05-24
_audit_creation_method          'WinGX routine CIF_UPDATE'
_audit_conform_dict_name        cif_core.dic
_audit_conform_dict_version     2.4
_audit_conform_dict_location    ftp://ftp.iucr.org/pub/cif_core.dic
_audit_update_record            ?
 
#------------------  SECTION 2. COMPOUND(S) DETAILS -------------------------#
 
data_JF116
 
_audit_creation_date                    2012-05-24T13:44:11-00:00
_audit_creation_method                  'WinGX routine CIF_UPDATE'
_audit_conform_dict_name                cif_core.dic
_audit_conform_dict_version             2.4
_audit_conform_dict_location            ftp://ftp.iucr.org/pub/cif_core.dic
_publ_requested_category                FM
 
#----------------------------------------------------------------------------#
#                   CHEMICAL INFORMATION                                     #
#----------------------------------------------------------------------------#
 
_chemical_name_systematic
;
 ?
;
_chemical_formula_moiety                'C36 H37 Au Cl N3'
_chemical_formula_sum                   'C36 H37 Au Cl N3'
_chemical_formula_weight                744.11
_chemical_compound_source               'synthesis as described'
_chemical_absolute_configuration        ad
 
#----------------------------------------------------------------------------#
#                   UNIT CELL INFORMATION                                    #
#----------------------------------------------------------------------------#
 
_symmetry_cell_setting                  orthorhombic
_symmetry_space_group_name_H-M          'C 2 2 2'
_symmetry_space_group_name_Hall         'C 2 2'
_symmetry_Int_Tables_number             21
loop_
    _symmetry_equiv_pos_as_xyz
'x, y, z'
'x, -y, -z'
'-x, y, -z'
'-x, -y, z'
'x+1/2, y+1/2, z'
'x+1/2, -y+1/2, -z'
'-x+1/2, y+1/2, -z'
'-x+1/2, -y+1/2, z'
 
_cell_length_a                          24.428(4)
_cell_length_b                          27.216(4)
_cell_length_c                          12.0685(18)
_cell_angle_alpha                       90
_cell_angle_beta                        90
_cell_angle_gamma                       90
_cell_volume                            8024(2)
_cell_formula_units_Z                   8
_cell_measurement_temperature           100(2)
_cell_measurement_reflns_used           1973
_cell_measurement_theta_min             2.24
_cell_measurement_theta_max             26.14
_cell_measurement_wavelength            0.71073
 
#----------------------------------------------------------------------------#
#                   CRYSTAL INFORMATION                                      #
#----------------------------------------------------------------------------#
 
_exptl_crystal_description              prism
_exptl_crystal_colour                   colourless
_exptl_crystal_size_max                 0.25
_exptl_crystal_size_mid                 0.11
_exptl_crystal_size_min                 0.05
_exptl_crystal_density_diffrn           1.232
_exptl_crystal_density_method           'not measured'
_exptl_crystal_F_000                    2960
_exptl_special_details
;
 ?
;
 
#----------------------------------------------------------------------------#
#                   ABSORPTION CORRECTION                                    #
#----------------------------------------------------------------------------#
 
_exptl_absorpt_coefficient_mu           3.756
_exptl_absorpt_correction_T_max		0.6880
_exptl_absorpt_correction_T_min		0.5200
_exptl_absorpt_correction_type          multi-scan
_exptl_absorpt_process_details          'BRUKER SADABS'
 
#----------------------------------------------------------------------------#
#                   DATA COLLECTION                                          #
#----------------------------------------------------------------------------#
 
_diffrn_ambient_temperature             100(2)
_diffrn_radiation_wavelength            0.7107
_diffrn_radiation_type                  MoK\a
_diffrn_radiation_probe                 x-ray
_diffrn_radiation_source               'fine-focus sealed tube'
_diffrn_radiation_monochromator         graphite
_diffrn_measurement_device_type        'Smart-CCD-1000 BRUKER'
_diffrn_measurement_method             'omega scans'
_diffrn_reflns_av_R_equivalents         0.0619
_diffrn_reflns_av_unetI/netI            0.0418
_diffrn_reflns_number                   46289
_diffrn_reflns_limit_h_min              -30
_diffrn_reflns_limit_h_max              30
_diffrn_reflns_limit_k_min              -33
_diffrn_reflns_limit_k_max              33
_diffrn_reflns_limit_l_min              -14
_diffrn_reflns_limit_l_max              14
_diffrn_reflns_theta_min                1.67
_diffrn_reflns_theta_max                26.02
_diffrn_reflns_theta_full               26.02
_diffrn_measured_fraction_theta_full
                                        0.999
_diffrn_measured_fraction_theta_max
                                        0.999
_reflns_number_total                    7921
_reflns_number_gt                       7200
_reflns_threshold_expression            >2\s(I)
 
#----------------------------------------------------------------------------#
#                   COMPUTER PROGRAMS USED                                   #
#----------------------------------------------------------------------------#
 
_computing_data_collection              'BRUKER Smart'
_computing_cell_refinement              'BRUKER Smart'
_computing_data_reduction               'BRUKER Saint'
_computing_structure_solution           'DIRDIF99 ( Beurskens et al, 1999)' 
_computing_structure_refinement         'SHELXL-97 (Sheldrick, 2008)'
_computing_molecular_graphics           'Ortep-3 for Windows (Farrugia, 1997)'
_computing_publication_material
                                   'WinGX publication routines (Farrugia, 1999)'
 
#----------------------------------------------------------------------------#
#                   STRUCTURE SOLUTION
#----------------------------------------------------------------------------#
 
_atom_sites_solution_primary            direct
_atom_sites_solution_secondary          difmap
_atom_sites_solution_hydrogens          geom
 
#----------------------------------------------------------------------------#
#                   REFINEMENT INFORMATION                                   #
#----------------------------------------------------------------------------#
 
_refine_special_details
;
 Refinement of F^2^ against ALL reflections.  The weighted R-factor wR and
 goodness of fit S are based on F^2^, conventional R-factors R are based
 on F, with F set to zero for negative F^2^. The threshold expression of
 F^2^ > 2\s(F^2^) is used only for calculating R-factors(gt) etc. and is
 not relevant to the choice of reflections for refinement.  R-factors based
 on F^2^ are statistically about twice as large as those based on F, and R-
 factors based on ALL data will be even larger.
;
_refine_ls_structure_factor_coef        Fsqd
_refine_ls_matrix_type                  full
_refine_ls_weighting_scheme             calc
_refine_ls_weighting_details
        'calc w=1/[\s^2^(Fo^2^)+(0.0282P)^2^+15.2951P] where P=(Fo^2^+2Fc^2^)/3'
_refine_ls_hydrogen_treatment           constr
_refine_ls_extinction_method            none
_refine_ls_number_reflns                7921
_refine_ls_number_parameters            389
_refine_ls_number_restraints            0
_refine_ls_R_factor_all                 0.0385
_refine_ls_R_factor_gt                  0.0324
_refine_ls_wR_factor_ref                0.069
_refine_ls_wR_factor_gt                 0.0669
_refine_ls_goodness_of_fit_ref          1.055
_refine_ls_restrained_S_all             1.055
_refine_ls_shift/su_max                 0.002
_refine_ls_shift/su_mean                0
_refine_ls_abs_structure_details
                                    'Flack H D (1983), Acta Cryst. A39, 876-881'
_refine_ls_abs_structure_Flack          -0.022(7)
_refine_diff_density_max                0.807
_refine_diff_density_min                -1.147
_refine_diff_density_rms                0.092


#----------------------------------------------------------------------------# 
# 			SQUEEZE RESULTS 				     #
#----------------------------------------------------------------------------#
# Note: Data are Listed for all Voids in the P1 Unit Cell
# i.e. Centre of Gravity, Solvent Accessible Volume,
# Recovered number of Electrons in the Void and
# Details about the Squeezed Material
loop_
  _platon_squeeze_void_nr
  _platon_squeeze_void_average_x
  _platon_squeeze_void_average_y
  _platon_squeeze_void_average_z
  _platon_squeeze_void_volume
  _platon_squeeze_void_count_electrons
  _platon_squeeze_void_content
   1  0.000 -0.003 -0.003      1306       431 ' '
   2  0.500 -0.006 -0.002      1306       431 ' '
_platon_squeeze_details
;
;


#----------------------------------------------------------------------------#
#                   ATOMIC TYPES, COORDINATES AND THERMAL PARAMETERS         #
#----------------------------------------------------------------------------#
 
loop_
    _atom_type_symbol
    _atom_type_description
    _atom_type_scat_dispersion_real
    _atom_type_scat_dispersion_imag
    _atom_type_scat_source
C C 0.0033 0.0016 'International Tables Vol C Tables 4.2.6.8 and 6.1.1.4'
H H 0 0 'International Tables Vol C Tables 4.2.6.8 and 6.1.1.4'
Au Au -2.0133 8.8022 'International Tables Vol C Tables 4.2.6.8 and 6.1.1.4'
Cl Cl 0.1484 0.1585 'International Tables Vol C Tables 4.2.6.8 and 6.1.1.4'
N N 0.0061 0.0033 'International Tables Vol C Tables 4.2.6.8 and 6.1.1.4'
O O 0.0106 0.006 'International Tables Vol C Tables 4.2.6.8 and 6.1.1.4'
 
loop_
    _atom_site_label
    _atom_site_type_symbol
    _atom_site_fract_x
    _atom_site_fract_y
    _atom_site_fract_z
    _atom_site_U_iso_or_equiv
    _atom_site_adp_type
    _atom_site_occupancy
    _atom_site_symmetry_multiplicity
    _atom_site_calc_flag
    _atom_site_refinement_flags
    _atom_site_disorder_assembly
    _atom_site_disorder_group
Cl1 Cl 0.86103(6) 0.39514(5) 0.37787(11) 0.0346(3) Uani 1 1 d . . .
Au1 Au 0.800662(7) 0.368545(7) 0.507496(14) 0.02341(6) Uani 1 1 d . . .
N1 N 0.7026(2) 0.31752(19) 0.6106(4) 0.0361(12) Uani 1 1 d . A .
N2 N 0.6826(2) 0.2980(2) 0.7069(4) 0.0506(16) Uani 1 1 d . . .
N3 N 0.76037(18) 0.33983(16) 0.7336(3) 0.0264(10) Uani 1 1 d . . .
C1 C 0.7500(2) 0.34185(17) 0.6191(4) 0.0268(12) Uani 1 1 d . . .
C2 C 0.8020(2) 0.36178(18) 0.7938(4) 0.0248(10) Uani 1 1 d . . .
C3 C 0.8021(3) 0.35427(19) 0.9072(4) 0.0283(12) Uani 1 1 d . . .
C4 C 0.8418(2) 0.3762(2) 0.9755(4) 0.0338(13) Uani 1 1 d . . .
H4 H 0.8685 0.3961 0.9437 0.041 Uiso 1 1 calc R . .
C5 C 0.8420(3) 0.3689(3) 1.0873(5) 0.0467(16) Uani 1 1 d . . .
H5 H 0.8695 0.3825 1.1308 0.056 Uiso 1 1 calc R . .
C6 C 0.7998(4) 0.3405(2) 1.1374(5) 0.0528(19) Uani 1 1 d . . .
H6 H 0.7993 0.3363 1.2139 0.063 Uiso 1 1 calc R . .
C7 C 0.7605(4) 0.3195(3) 1.0749(5) 0.053(2) Uani 1 1 d . . .
H7 H 0.7331 0.3013 1.1093 0.063 Uiso 1 1 calc R . .
C8 C 0.7599(3) 0.3244(2) 0.9596(5) 0.0452(18) Uani 1 1 d . . .
C9 C 0.7190(3) 0.3044(3) 0.8963(5) 0.058(2) Uani 1 1 d . . .
H9 H 0.6914 0.2859 0.9293 0.07 Uiso 1 1 calc R . .
C10 C 0.7189(3) 0.3123(2) 0.7809(5) 0.0404(15) Uani 1 1 d . . .
C11 C 0.8433(2) 0.3924(2) 0.7367(4) 0.0231(11) Uani 1 1 d . . .
C12 C 0.8951(2) 0.3718(2) 0.7117(5) 0.0358(13) Uani 1 1 d . . .
C13 C 0.9078(3) 0.3225(2) 0.7297(6) 0.0503(18) Uani 1 1 d . . .
H13 H 0.882 0.3016 0.7607 0.06 Uiso 1 1 calc R . .
C14 C 0.9582(3) 0.3051(3) 0.7018(10) 0.098(4) Uani 1 1 d . . .
H14 H 0.9652 0.2717 0.7091 0.118 Uiso 1 1 calc R . .
C15 C 1.0003(5) 0.3359(3) 0.6622(9) 0.111(4) Uani 1 1 d . . .
H15 H 1.0352 0.3236 0.6494 0.133 Uiso 1 1 calc R . .
C16 C 0.9889(3) 0.3840(3) 0.6430(8) 0.090(3) Uani 1 1 d . . .
H16 H 1.0158 0.4046 0.6149 0.107 Uiso 1 1 calc R . .
C19 C 0.8745(3) 0.4717(2) 0.6696(5) 0.0382(15) Uani 1 1 d . . .
H19 H 0.868 0.5048 0.6568 0.046 Uiso 1 1 calc R . .
C17 C 0.9363(3) 0.4027(3) 0.6656(6) 0.0490(18) Uani 1 1 d . . .
C18 C 0.9244(3) 0.4521(3) 0.6439(5) 0.0482(18) Uani 1 1 d . . .
H18 H 0.9509 0.472 0.6114 0.058 Uiso 1 1 calc R . .
C20 C 0.8322(2) 0.44164(19) 0.7162(4) 0.0261(12) Uani 1 1 d . . .
C21 C 0.7788(2) 0.4652(2) 0.7456(4) 0.0292(13) Uani 1 1 d . . .
H21 H 0.7546 0.4394 0.7739 0.035 Uiso 1 1 calc R . .
C22 C 0.7858(2) 0.5032(3) 0.8370(4) 0.0355(12) Uani 1 1 d . . .
H22A H 0.8121 0.5278 0.813 0.043 Uiso 1 1 calc R . .
H22B H 0.8004 0.4873 0.9025 0.043 Uiso 1 1 calc R . .
C23 C 0.7318(3) 0.5287(2) 0.8668(5) 0.0473(18) Uani 1 1 d . . .
H23A H 0.707 0.5052 0.9003 0.057 Uiso 1 1 calc R . .
H23B H 0.7387 0.5546 0.9204 0.057 Uiso 1 1 calc R . .
C24 C 0.7052(3) 0.5507(2) 0.7635(5) 0.056(2) Uani 1 1 d . . .
H24A H 0.6701 0.5649 0.7834 0.068 Uiso 1 1 calc R . .
H24B H 0.7282 0.5769 0.7352 0.068 Uiso 1 1 calc R . .
C25 C 0.6967(3) 0.5124(3) 0.6726(5) 0.057(2) Uani 1 1 d . . .
H25A H 0.671 0.4876 0.6981 0.069 Uiso 1 1 calc R . .
H25B H 0.6813 0.528 0.6074 0.069 Uiso 1 1 calc R . .
C26 C 0.7508(2) 0.4884(2) 0.6432(5) 0.0365(16) Uani 1 1 d . . .
H26A H 0.775 0.5128 0.6111 0.044 Uiso 1 1 calc R . .
H26B H 0.7446 0.4631 0.5879 0.044 Uiso 1 1 calc R . .
C27 C 0.66765(18) 0.31122(19) 0.5100(5) 0.0314(11) Uani 1 1 d . . .
C28 C 0.6147(5) 0.3432(4) 0.5278(9) 0.0341(18) Uani 0.494(4) 1 d P A 1
H28A H 0.6242 0.3778 0.5298 0.041 Uiso 0.494(4) 1 calc PR A 1
H28B H 0.5973 0.3346 0.5974 0.041 Uiso 0.494(4) 1 calc PR A 1
C29 C 0.6952(6) 0.3330(4) 0.4015(8) 0.0306(18) Uani 0.494(4) 1 d P A 1
H29A H 0.729 0.3156 0.3856 0.037 Uiso 0.494(4) 1 calc PR A 1
H29B H 0.7037 0.3674 0.4122 0.037 Uiso 0.494(4) 1 calc PR A 1
C30 C 0.6555(4) 0.2591(3) 0.4942(13) 0.0390(19) Uani 0.494(4) 1 d P A 1
H30A H 0.6392 0.246 0.5613 0.047 Uiso 0.494(4) 1 calc PR A 1
H30B H 0.6893 0.2414 0.4807 0.047 Uiso 0.494(4) 1 calc PR A 1
C31 C 0.5738(8) 0.3325(8) 0.4266(14) 0.033(3) Uani 0.494(4) 1 d P A 1
H31 H 0.5389 0.3494 0.4388 0.039 Uiso 0.494(4) 1 calc PR A 1
C32 C 0.6021(6) 0.3534(5) 0.3260(11) 0.029(3) Uani 0.494(4) 1 d P A 1
H32A H 0.5762 0.3542 0.265 0.035 Uiso 0.494(4) 1 calc PR A 1
H32B H 0.6128 0.387 0.3418 0.035 Uiso 0.494(4) 1 calc PR A 1
C33 C 0.6499(3) 0.3262(2) 0.2918(6) 0.0431(15) Uani 0.494(4) 1 d P A 1
H33 H 0.6652 0.3393 0.2228 0.052 Uiso 0.494(4) 1 calc PR A 1
C34 C 0.6444(8) 0.2716(8) 0.2875(15) 0.045(4) Uani 0.494(4) 1 d P A 1
H34A H 0.6804 0.257 0.2794 0.054 Uiso 0.494(4) 1 calc PR A 1
H34B H 0.6228 0.2625 0.2233 0.054 Uiso 0.494(4) 1 calc PR A 1
C35 C 0.6161(7) 0.2508(7) 0.3963(12) 0.038(3) Uani 0.494(4) 1 d P A 1
H35 H 0.6069 0.216 0.3882 0.046 Uiso 0.494(4) 1 calc PR A 1
C36 C 0.5651(6) 0.2816(6) 0.4174(14) 0.0431(15) Uani 0.494(4) 1 d P A 1
H36A H 0.5395 0.2758 0.3574 0.052 Uiso 0.494(4) 1 calc PR A 1
H36B H 0.5481 0.2701 0.4852 0.052 Uiso 0.494(4) 1 calc PR A 1
C28B C 0.6986(5) 0.2812(4) 0.4229(8) 0.0341(18) Uani 0.506(4) 1 d P A 2
H28C H 0.7069 0.2487 0.4513 0.041 Uiso 0.506(4) 1 calc PR A 2
H28D H 0.7327 0.2973 0.4037 0.041 Uiso 0.506(4) 1 calc PR A 2
C29B C 0.6164(5) 0.2759(4) 0.5422(8) 0.0306(18) Uani 0.506(4) 1 d P A 2
H29C H 0.6297 0.2442 0.5669 0.037 Uiso 0.506(4) 1 calc PR A 2
H29D H 0.5954 0.2905 0.602 0.037 Uiso 0.506(4) 1 calc PR A 2
C30B C 0.6494(5) 0.3575(4) 0.4765(10) 0.0390(19) Uani 0.506(4) 1 d P A 2
H30C H 0.6805 0.3782 0.4587 0.047 Uiso 0.506(4) 1 calc PR A 2
H30D H 0.6292 0.373 0.5364 0.047 Uiso 0.506(4) 1 calc PR A 2
C31B C 0.6613(6) 0.2774(7) 0.3202(13) 0.033(3) Uani 0.506(4) 1 d P A 2
H31B H 0.6817 0.2619 0.2597 0.039 Uiso 0.506(4) 1 calc PR A 2
C32B C 0.6130(6) 0.2462(6) 0.3482(11) 0.029(3) Uani 0.506(4) 1 d P A 2
H32C H 0.6253 0.2139 0.3713 0.035 Uiso 0.506(4) 1 calc PR A 2
H32D H 0.5901 0.2423 0.2831 0.035 Uiso 0.506(4) 1 calc PR A 2
C33B C 0.5802(7) 0.2696(6) 0.4399(13) 0.0431(15) Uani 0.506(4) 1 d P A 2
H33B H 0.5478 0.2498 0.4574 0.052 Uiso 0.506(4) 1 calc PR A 2
C34B C 0.5631(9) 0.3226(8) 0.3990(18) 0.045(4) Uani 0.506(4) 1 d P A 2
H34C H 0.5408 0.3199 0.3328 0.054 Uiso 0.506(4) 1 calc PR A 2
H34D H 0.5415 0.3387 0.4559 0.054 Uiso 0.506(4) 1 calc PR A 2
C35B C 0.6124(6) 0.3523(6) 0.3748(12) 0.038(3) Uani 0.506(4) 1 d P A 2
H35B H 0.602 0.3848 0.3467 0.046 Uiso 0.506(4) 1 calc PR A 2
C36B C 0.6499(3) 0.3262(2) 0.2918(6) 0.0431(15) Uani 0.506(4) 1 d P A 2
H36C H 0.6327 0.3268 0.2194 0.052 Uiso 0.506(4) 1 calc PR A 2
H36D H 0.684 0.3442 0.2865 0.052 Uiso 0.506(4) 1 calc PR A 2
 
loop_
    _atom_site_aniso_label
    _atom_site_aniso_U_11
    _atom_site_aniso_U_22
    _atom_site_aniso_U_33
    _atom_site_aniso_U_23
    _atom_site_aniso_U_13
    _atom_site_aniso_U_12
Cl1 0.0445(8) 0.0296(7) 0.0298(7) 0.0028(6) 0.0126(6) -0.0013(7)
Au1 0.03106(9) 0.02116(8) 0.01802(8) -0.00019(10) 0.00419(10) -0.00050(9)
N1 0.034(3) 0.045(3) 0.030(2) 0.001(2) -0.003(2) -0.013(3)
N2 0.040(3) 0.082(5) 0.030(3) -0.001(3) 0.009(2) -0.029(3)
N3 0.028(2) 0.028(2) 0.023(2) 0.0008(19) 0.0049(19) -0.010(2)
C1 0.034(3) 0.013(2) 0.033(3) -0.004(2) -0.009(2) 0.001(2)
C2 0.025(2) 0.023(3) 0.026(2) -0.003(2) 0.000(2) -0.004(3)
C3 0.036(3) 0.026(3) 0.023(2) 0.0027(19) 0.007(3) 0.002(3)
C4 0.042(3) 0.032(3) 0.028(3) -0.006(3) 0.006(2) -0.005(2)
C5 0.064(4) 0.042(4) 0.034(3) -0.014(4) -0.008(3) 0.004(4)
C6 0.091(6) 0.040(4) 0.027(3) 0.000(3) 0.017(4) -0.014(4)
C7 0.087(6) 0.043(4) 0.028(3) -0.004(3) 0.015(4) -0.024(4)
C8 0.065(5) 0.039(4) 0.031(3) 0.002(3) 0.010(3) -0.013(3)
C9 0.077(6) 0.061(5) 0.036(4) 0.000(3) 0.021(3) -0.037(4)
C10 0.040(4) 0.047(4) 0.034(3) 0.001(3) 0.013(3) -0.019(3)
C11 0.022(3) 0.028(3) 0.019(2) -0.006(2) 0.001(2) -0.008(2)
C12 0.028(3) 0.035(3) 0.044(3) -0.019(3) 0.010(2) 0.000(3)
C13 0.031(3) 0.036(4) 0.084(5) -0.019(4) 0.005(4) 0.001(3)
C14 0.044(5) 0.035(5) 0.216(13) -0.035(6) -0.001(6) 0.007(4)
C15 0.038(4) 0.073(5) 0.222(11) -0.071(7) 0.030(9) -0.006(8)
C16 0.041(6) 0.070(5) 0.158(9) -0.068(6) 0.036(5) -0.026(4)
C19 0.051(4) 0.033(4) 0.031(3) -0.004(3) 0.006(3) -0.010(3)
C17 0.036(4) 0.054(5) 0.057(4) -0.029(4) 0.017(3) -0.007(3)
C18 0.048(4) 0.052(5) 0.044(4) -0.016(3) 0.014(3) -0.026(4)
C20 0.036(3) 0.021(3) 0.021(3) -0.004(2) -0.002(2) -0.003(2)
C21 0.036(3) 0.028(3) 0.023(3) -0.001(2) 0.003(2) 0.004(3)
C22 0.050(3) 0.035(3) 0.022(2) -0.003(3) 0.001(2) 0.004(4)
C23 0.074(5) 0.036(4) 0.032(3) 0.000(3) 0.011(3) 0.022(3)
C24 0.082(6) 0.044(4) 0.044(4) 0.008(3) 0.006(4) 0.033(4)
C25 0.067(4) 0.066(6) 0.039(3) 0.002(3) -0.005(3) 0.032(4)
C26 0.049(4) 0.036(4) 0.025(3) 0.000(2) -0.006(2) 0.017(3)
C27 0.024(2) 0.042(3) 0.029(3) -0.008(3) 0.005(3) -0.002(2)
C28 0.037(4) 0.031(4) 0.034(4) 0.005(3) -0.002(4) 0.007(4)
C29 0.034(5) 0.028(4) 0.030(4) -0.009(3) 0.007(4) -0.001(4)
C30 0.038(4) 0.028(4) 0.050(5) 0.002(4) 0.014(5) -0.007(3)
C31 0.026(7) 0.047(9) 0.025(7) 0.009(6) 0.004(5) 0.013(6)
C32 0.031(5) 0.027(5) 0.030(6) -0.001(5) -0.003(5) -0.008(4)
C33 0.044(4) 0.034(3) 0.051(4) -0.003(3) 0.013(3) -0.005(3)
C34 0.042(10) 0.046(7) 0.048(10) -0.017(7) -0.003(6) 0.012(7)
C35 0.042(6) 0.037(6) 0.035(7) 0.008(6) -0.002(6) 0.010(5)
C36 0.044(4) 0.034(3) 0.051(4) -0.003(3) 0.013(3) -0.005(3)
C28B 0.037(4) 0.031(4) 0.034(4) 0.005(3) -0.002(4) 0.007(4)
C29B 0.034(5) 0.028(4) 0.030(4) -0.009(3) 0.007(4) -0.001(4)
C30B 0.038(4) 0.028(4) 0.050(5) 0.002(4) 0.014(5) -0.007(3)
C31B 0.026(7) 0.047(9) 0.025(7) 0.009(6) 0.004(5) 0.013(6)
C32B 0.031(5) 0.027(5) 0.030(6) -0.001(5) -0.003(5) -0.008(4)
C33B 0.044(4) 0.034(3) 0.051(4) -0.003(3) 0.013(3) -0.005(3)
C34B 0.042(10) 0.046(7) 0.048(10) -0.017(7) -0.003(6) 0.012(7)
C35B 0.042(6) 0.037(6) 0.035(7) 0.008(6) -0.002(6) 0.010(5)
C36B 0.044(4) 0.034(3) 0.051(4) -0.003(3) 0.013(3) -0.005(3)
 
 
#----------------------------------------------------------------------------#
#                   MOLECULAR GEOMETRY                                       #
#----------------------------------------------------------------------------#
 
_geom_special_details
;
 All s.u.'s (except the s.u. in the dihedral angle between two l.s. planes)
 are estimated using the full covariance matrix.  The cell s.u.'s are taken
 into account individually in the estimation of s.u.'s in distances, angles
 and torsion angles; correlations between s.u.'s in cell parameters are only
 used when they are defined by crystal symmetry.  An approximate (isotropic)
 treatment of cell s.u.'s is used for estimating s.u.'s involving l.s. planes.
;
loop_
    _geom_bond_atom_site_label_1
    _geom_bond_atom_site_label_2
    _geom_bond_distance
    _geom_bond_site_symmetry_2
    _geom_bond_publ_flag
Cl1 Au1 2.2685(13) . ?
Au1 C1 1.968(6) . ?
N1 C1 1.337(7) . ?
N1 N2 1.369(7) . ?
N1 C27 1.494(7) . ?
N2 C10 1.318(8) . ?
N3 C10 1.384(7) . ?
N3 C2 1.386(6) . ?
N3 C1 1.406(7) . ?
C2 C3 1.384(6) . ?
C2 C11 1.477(7) . ?
C3 C4 1.406(7) . ?
C3 C8 1.457(8) . ?
C4 C5 1.365(8) . ?
C4 H4 0.93 . ?
C5 C6 1.424(10) . ?
C5 H5 0.93 . ?
C6 C7 1.346(10) . ?
C6 H6 0.93 . ?
C7 C8 1.398(8) . ?
C7 H7 0.93 . ?
C8 C9 1.371(9) . ?
C9 C10 1.409(8) . ?
C9 H9 0.93 . ?
C11 C20 1.390(7) . ?
C11 C12 1.416(7) . ?
C12 C13 1.393(9) . ?
C12 C17 1.426(9) . ?
C13 C14 1.362(10) . ?
C13 H13 0.93 . ?
C14 C15 1.410(13) . ?
C14 H14 0.93 . ?
C15 C16 1.357(12) . ?
C15 H15 0.93 . ?
C16 C17 1.407(10) . ?
C16 H16 0.93 . ?
C19 C18 1.364(9) . ?
C19 C20 1.432(8) . ?
C19 H19 0.93 . ?
C17 C18 1.402(10) . ?
C18 H18 0.93 . ?
C20 C21 1.496(8) . ?
C21 C22 1.523(8) . ?
C21 C26 1.547(7) . ?
C21 H21 0.98 . ?
C22 C23 1.534(8) . ?
C22 H22A 0.97 . ?
C22 H22B 0.97 . ?
C23 C24 1.528(8) . ?
C23 H23A 0.97 . ?
C23 H23B 0.97 . ?
C24 C25 1.527(9) . ?
C24 H24A 0.97 . ?
C24 H24B 0.97 . ?
C25 C26 1.519(8) . ?
C25 H25A 0.97 . ?
C25 H25B 0.97 . ?
C26 H26A 0.97 . ?
C26 H26B 0.97 . ?
C27 C30B 1.397(11) . ?
C27 C30 1.462(10) . ?
C27 C28B 1.532(12) . ?
C27 C28 1.574(11) . ?
C27 C29 1.587(12) . ?
C27 C29B 1.626(12) . ?
C28 C31 1.604(19) . ?
C28 H28A 0.97 . ?
C28 H28B 0.97 . ?
C29 C33 1.735(14) . ?
C29 H29A 0.97 . ?
C29 H29B 0.97 . ?
C30 C35 1.54(2) . ?
C30 H30A 0.97 . ?
C30 H30B 0.97 . ?
C31 C36 1.41(3) . ?
C31 C32 1.51(2) . ?
C31 H31 0.98 . ?
C32 C33 1.442(15) . ?
C32 H32A 0.97 . ?
C32 H32B 0.97 . ?
C33 C34 1.49(2) . ?
C33 H33 0.98 . ?
C34 C35 1.59(3) . ?
C34 H34A 0.97 . ?
C34 H34B 0.97 . ?
C35 C36 1.52(2) . ?
C35 H35 0.98 . ?
C36 H36A 0.97 . ?
C36 H36B 0.97 . ?
C28B C31B 1.542(17) . ?
C28B H28C 0.97 . ?
C28B H28D 0.97 . ?
C29B C33B 1.528(18) . ?
C29B H29C 0.97 . ?
C29B H29D 0.97 . ?
C30B C35B 1.530(17) . ?
C30B H30C 0.97 . ?
C30B H30D 0.97 . ?
C31B C32B 1.49(2) . ?
C31B H31B 0.98 . ?
C32B C33B 1.51(2) . ?
C32B H32C 0.97 . ?
C32B H32D 0.97 . ?
C33B C34B 1.58(3) . ?
C33B H33B 0.98 . ?
C34B C35B 1.48(3) . ?
C34B H34C 0.97 . ?
C34B H34D 0.97 . ?
C35B H35B 0.98 . ?
 
loop_
    _geom_angle_atom_site_label_1
    _geom_angle_atom_site_label_2
    _geom_angle_atom_site_label_3
    _geom_angle
    _geom_angle_site_symmetry_1
    _geom_angle_site_symmetry_3
    _geom_angle_publ_flag
C1 Au1 Cl1 176.88(14) . . ?
C1 N1 N2 115.9(5) . . ?
C1 N1 C27 127.8(5) . . ?
N2 N1 C27 116.2(5) . . ?
C10 N2 N1 102.7(5) . . ?
C10 N3 C2 123.7(5) . . ?
C10 N3 C1 107.1(5) . . ?
C2 N3 C1 129.1(4) . . ?
N1 C1 N3 102.2(4) . . ?
N1 C1 Au1 132.5(4) . . ?
N3 C1 Au1 125.0(4) . . ?
C3 C2 N3 117.1(5) . . ?
C3 C2 C11 122.9(5) . . ?
N3 C2 C11 120.0(4) . . ?
C2 C3 C4 121.2(5) . . ?
C2 C3 C8 120.7(5) . . ?
C4 C3 C8 118.1(5) . . ?
C5 C4 C3 121.3(6) . . ?
C5 C4 H4 119.3 . . ?
C3 C4 H4 119.3 . . ?
C4 C5 C6 119.8(6) . . ?
C4 C5 H5 120.1 . . ?
C6 C5 H5 120.1 . . ?
C7 C6 C5 120.5(6) . . ?
C7 C6 H6 119.7 . . ?
C5 C6 H6 119.7 . . ?
C6 C7 C8 121.7(7) . . ?
C6 C7 H7 119.1 . . ?
C8 C7 H7 119.1 . . ?
C9 C8 C7 121.7(7) . . ?
C9 C8 C3 119.7(6) . . ?
C7 C8 C3 118.5(7) . . ?
C8 C9 C10 119.4(6) . . ?
C8 C9 H9 120.3 . . ?
C10 C9 H9 120.3 . . ?
N2 C10 N3 111.9(5) . . ?
N2 C10 C9 128.7(6) . . ?
N3 C10 C9 119.3(6) . . ?
C20 C11 C12 121.1(5) . . ?
C20 C11 C2 119.6(5) . . ?
C12 C11 C2 119.1(5) . . ?
C13 C12 C11 123.2(6) . . ?
C13 C12 C17 118.1(5) . . ?
C11 C12 C17 118.8(6) . . ?
C14 C13 C12 119.9(7) . . ?
C14 C13 H13 120.1 . . ?
C12 C13 H13 120.1 . . ?
C13 C14 C15 122.5(8) . . ?
C13 C14 H14 118.8 . . ?
C15 C14 H14 118.8 . . ?
C16 C15 C14 118.7(10) . . ?
C16 C15 H15 120.7 . . ?
C14 C15 H15 120.7 . . ?
C15 C16 C17 120.2(9) . . ?
C15 C16 H16 119.9 . . ?
C17 C16 H16 119.9 . . ?
C18 C19 C20 120.7(6) . . ?
C18 C19 H19 119.6 . . ?
C20 C19 H19 119.6 . . ?
C18 C17 C16 120.1(7) . . ?
C18 C17 C12 119.4(6) . . ?
C16 C17 C12 120.5(7) . . ?
C19 C18 C17 121.2(6) . . ?
C19 C18 H18 119.4 . . ?
C17 C18 H18 119.4 . . ?
C11 C20 C19 118.7(5) . . ?
C11 C20 C21 122.7(5) . . ?
C19 C20 C21 118.6(5) . . ?
C20 C21 C22 111.4(5) . . ?
C20 C21 C26 111.7(4) . . ?
C22 C21 C26 110.5(5) . . ?
C20 C21 H21 107.7 . . ?
C22 C21 H21 107.7 . . ?
C26 C21 H21 107.7 . . ?
C21 C22 C23 112.4(5) . . ?
C21 C22 H22A 109.1 . . ?
C23 C22 H22A 109.1 . . ?
C21 C22 H22B 109.1 . . ?
C23 C22 H22B 109.1 . . ?
H22A C22 H22B 107.9 . . ?
C24 C23 C22 110.6(5) . . ?
C24 C23 H23A 109.5 . . ?
C22 C23 H23A 109.5 . . ?
C24 C23 H23B 109.5 . . ?
C22 C23 H23B 109.5 . . ?
H23A C23 H23B 108.1 . . ?
C25 C24 C23 112.1(5) . . ?
C25 C24 H24A 109.2 . . ?
C23 C24 H24A 109.2 . . ?
C25 C24 H24B 109.2 . . ?
C23 C24 H24B 109.2 . . ?
H24A C24 H24B 107.9 . . ?
C26 C25 C24 110.1(6) . . ?
C26 C25 H25A 109.6 . . ?
C24 C25 H25A 109.6 . . ?
C26 C25 H25B 109.6 . . ?
C24 C25 H25B 109.6 . . ?
H25A C25 H25B 108.2 . . ?
C25 C26 C21 111.9(5) . . ?
C25 C26 H26A 109.2 . . ?
C21 C26 H26A 109.2 . . ?
C25 C26 H26B 109.2 . . ?
C21 C26 H26B 109.2 . . ?
H26A C26 H26B 107.9 . . ?
C30B C27 C30 140.6(8) . . ?
C30B C27 N1 108.3(6) . . ?
C30 C27 N1 109.5(7) . . ?
C30B C27 C28B 116.1(8) . . ?
C30 C27 C28B 59.5(7) . . ?
N1 C27 C28B 109.7(5) . . ?
C30 C27 C28 112.8(7) . . ?
N1 C27 C28 107.2(6) . . ?
C28B C27 C28 142.6(7) . . ?
C30B C27 C29 63.9(7) . . ?
C30 C27 C29 109.9(8) . . ?
N1 C27 C29 112.7(5) . . ?
C28B C27 C29 54.7(6) . . ?
C28 C27 C29 104.7(7) . . ?
C30B C27 C29B 110.9(7) . . ?
C30 C27 C29B 45.7(6) . . ?
N1 C27 C29B 108.3(6) . . ?
C28B C27 C29B 103.3(7) . . ?
C28 C27 C29B 70.2(6) . . ?
C29 C27 C29B 138.1(7) . . ?
C27 C28 C31 107.9(10) . . ?
C27 C28 H28A 110.1 . . ?
C31 C28 H28A 110.1 . . ?
C27 C28 H28B 110.1 . . ?
C31 C28 H28B 110.1 . . ?
H28A C28 H28B 108.4 . . ?
C27 C29 C33 108.6(8) . . ?
C27 C29 H29A 110 . . ?
C33 C29 H29A 110 . . ?
C27 C29 H29B 110 . . ?
C33 C29 H29B 110 . . ?
H29A C29 H29B 108.3 . . ?
C27 C30 C35 111.6(11) . . ?
C27 C30 H30A 109.3 . . ?
C35 C30 H30A 109.3 . . ?
C27 C30 H30B 109.3 . . ?
C35 C30 H30B 109.3 . . ?
H30A C30 H30B 108 . . ?
C36 C31 C32 112.2(15) . . ?
C36 C31 C28 109.4(14) . . ?
C32 C31 C28 105.1(14) . . ?
C36 C31 H31 110 . . ?
C32 C31 H31 110 . . ?
C28 C31 H31 110 . . ?
C33 C32 C31 114.0(12) . . ?
C33 C32 H32A 108.7 . . ?
C31 C32 H32A 108.7 . . ?
C33 C32 H32B 108.7 . . ?
C31 C32 H32B 108.7 . . ?
H32A C32 H32B 107.6 . . ?
C32 C33 C34 116.7(10) . . ?
C32 C33 C29 104.1(8) . . ?
C34 C33 C29 100.9(8) . . ?
C32 C33 H33 111.4 . . ?
C34 C33 H33 111.4 . . ?
C29 C33 H33 111.4 . . ?
C33 C34 C35 111.3(13) . . ?
C33 C34 H34A 109.4 . . ?
C35 C34 H34A 109.4 . . ?
C33 C34 H34B 109.4 . . ?
C35 C34 H34B 109.4 . . ?
H34A C34 H34B 108 . . ?
C36 C35 C30 107.7(13) . . ?
C36 C35 C34 107.4(13) . . ?
C30 C35 C34 108.1(13) . . ?
C36 C35 H35 111.2 . . ?
C30 C35 H35 111.2 . . ?
C34 C35 H35 111.2 . . ?
C31 C36 C35 115.5(15) . . ?
C31 C36 H36A 108.4 . . ?
C35 C36 H36A 108.4 . . ?
C31 C36 H36B 108.4 . . ?
C35 C36 H36B 108.4 . . ?
H36A C36 H36B 107.5 . . ?
C27 C28B C31B 107.2(10) . . ?
C27 C28B H28C 110.3 . . ?
C31B C28B H28C 110.3 . . ?
C27 C28B H28D 110.3 . . ?
C31B C28B H28D 110.3 . . ?
H28C C28B H28D 108.5 . . ?
C33B C29B C27 108.6(9) . . ?
C33B C29B H29C 110 . . ?
C27 C29B H29C 110 . . ?
C33B C29B H29D 110 . . ?
C27 C29B H29D 110 . . ?
H29C C29B H29D 108.4 . . ?
C27 C30B C35B 109.7(9) . . ?
C27 C30B H30C 109.7 . . ?
C35B C30B H30C 109.7 . . ?
C27 C30B H30D 109.7 . . ?
C35B C30B H30D 109.7 . . ?
H30C C30B H30D 108.2 . . ?
C32B C31B C28B 108.9(12) . . ?
C32B C31B H31B 109.1 . . ?
C28B C31B H31B 109.1 . . ?
C31B C32B C33B 110.2(13) . . ?
C31B C32B H32C 109.6 . . ?
C33B C32B H32C 109.6 . . ?
C31B C32B H32D 109.6 . . ?
C33B C32B H32D 109.6 . . ?
H32C C32B H32D 108.1 . . ?
C32B C33B C29B 109.5(12) . . ?
C32B C33B C34B 107.3(14) . . ?
C29B C33B C34B 107.6(13) . . ?
C32B C33B H33B 110.8 . . ?
C29B C33B H33B 110.8 . . ?
C34B C33B H33B 110.8 . . ?
C35B C34B C33B 110.1(16) . . ?
C35B C34B H34C 109.6 . . ?
C33B C34B H34C 109.6 . . ?
C35B C34B H34D 109.6 . . ?
C33B C34B H34D 109.6 . . ?
H34C C34B H34D 108.2 . . ?
C34B C35B C30B 111.8(13) . . ?
C34B C35B H35B 110.4 . . ?
C30B C35B H35B 110.4 . . ?
 
loop_
    _geom_torsion_atom_site_label_1
    _geom_torsion_atom_site_label_2
    _geom_torsion_atom_site_label_3
    _geom_torsion_atom_site_label_4
    _geom_torsion
    _geom_torsion_site_symmetry_1
    _geom_torsion_site_symmetry_2
    _geom_torsion_site_symmetry_3
    _geom_torsion_site_symmetry_4
    _geom_torsion_publ_flag
C1 N1 N2 C10 2.0(8) . . . . ?
C27 N1 N2 C10 -175.1(5) . . . . ?
N2 N1 C1 N3 -3.0(7) . . . . ?
C27 N1 C1 N3 173.8(5) . . . . ?
N2 N1 C1 Au1 170.4(5) . . . . ?
C27 N1 C1 Au1 -12.9(9) . . . . ?
C10 N3 C1 N1 2.7(6) . . . . ?
C2 N3 C1 N1 -175.0(5) . . . . ?
C10 N3 C1 Au1 -171.3(4) . . . . ?
C2 N3 C1 Au1 10.9(8) . . . . ?
C10 N3 C2 C3 1.6(8) . . . . ?
C1 N3 C2 C3 179.0(5) . . . . ?
C10 N3 C2 C11 -177.3(5) . . . . ?
C1 N3 C2 C11 0.1(8) . . . . ?
N3 C2 C3 C4 -178.2(5) . . . . ?
C11 C2 C3 C4 0.7(8) . . . . ?
N3 C2 C3 C8 0.1(8) . . . . ?
C11 C2 C3 C8 179.0(5) . . . . ?
C2 C3 C4 C5 179.9(6) . . . . ?
C8 C3 C4 C5 1.6(9) . . . . ?
C3 C4 C5 C6 -2.9(10) . . . . ?
C4 C5 C6 C7 1.8(11) . . . . ?
C5 C6 C7 C8 0.6(12) . . . . ?
C6 C7 C8 C9 -177.8(7) . . . . ?
C6 C7 C8 C3 -1.9(13) . . . . ?
C2 C3 C8 C9 -1.6(10) . . . . ?
C4 C3 C8 C9 176.8(6) . . . . ?
C2 C3 C8 C7 -177.5(7) . . . . ?
C4 C3 C8 C7 0.8(10) . . . . ?
C7 C8 C9 C10 177.1(8) . . . . ?
C3 C8 C9 C10 1.3(11) . . . . ?
N1 N2 C10 N3 0.0(8) . . . . ?
N1 N2 C10 C9 177.8(7) . . . . ?
C2 N3 C10 N2 176.1(6) . . . . ?
C1 N3 C10 N2 -1.7(7) . . . . ?
C2 N3 C10 C9 -1.9(9) . . . . ?
C1 N3 C10 C9 -179.7(6) . . . . ?
C8 C9 C10 N2 -177.3(7) . . . . ?
C8 C9 C10 N3 0.3(11) . . . . ?
C3 C2 C11 C20 -93.9(6) . . . . ?
N3 C2 C11 C20 84.9(6) . . . . ?
C3 C2 C11 C12 81.2(7) . . . . ?
N3 C2 C11 C12 -100.0(6) . . . . ?
C20 C11 C12 C13 -179.3(6) . . . . ?
C2 C11 C12 C13 5.7(8) . . . . ?
C20 C11 C12 C17 0.5(8) . . . . ?
C2 C11 C12 C17 -174.5(5) . . . . ?
C11 C12 C13 C14 178.8(7) . . . . ?
C17 C12 C13 C14 -1.0(11) . . . . ?
C12 C13 C14 C15 4.8(15) . . . . ?
C13 C14 C15 C16 -5.3(17) . . . . ?
C14 C15 C16 C17 1.8(15) . . . . ?
C15 C16 C17 C18 -178.9(9) . . . . ?
C15 C16 C17 C12 1.8(13) . . . . ?
C13 C12 C17 C18 178.4(6) . . . . ?
C11 C12 C17 C18 -1.4(9) . . . . ?
C13 C12 C17 C16 -2.3(10) . . . . ?
C11 C12 C17 C16 177.9(7) . . . . ?
C20 C19 C18 C17 -2.2(10) . . . . ?
C16 C17 C18 C19 -177.0(7) . . . . ?
C12 C17 C18 C19 2.2(10) . . . . ?
C12 C11 C20 C19 -0.4(7) . . . . ?
C2 C11 C20 C19 174.6(5) . . . . ?
C12 C11 C20 C21 -177.5(5) . . . . ?
C2 C11 C20 C21 -2.5(7) . . . . ?
C18 C19 C20 C11 1.3(8) . . . . ?
C18 C19 C20 C21 178.4(5) . . . . ?
C11 C20 C21 C22 113.2(6) . . . . ?
C19 C20 C21 C22 -63.9(7) . . . . ?
C11 C20 C21 C26 -122.6(6) . . . . ?
C19 C20 C21 C26 60.3(6) . . . . ?
C20 C21 C22 C23 178.7(5) . . . . ?
C26 C21 C22 C23 53.9(7) . . . . ?
C21 C22 C23 C24 -54.2(8) . . . . ?
C22 C23 C24 C25 55.4(9) . . . . ?
C23 C24 C25 C26 -56.7(8) . . . . ?
C24 C25 C26 C21 56.3(7) . . . . ?
C20 C21 C26 C25 -179.9(5) . . . . ?
C22 C21 C26 C25 -55.2(7) . . . . ?
C1 N1 C27 C30B -62.9(8) . . . . ?
N2 N1 C27 C30B 113.8(7) . . . . ?
C1 N1 C27 C30 128.3(7) . . . . ?
N2 N1 C27 C30 -55.0(8) . . . . ?
C1 N1 C27 C28B 64.7(8) . . . . ?
N2 N1 C27 C28B -118.6(7) . . . . ?
C1 N1 C27 C28 -109.0(7) . . . . ?
N2 N1 C27 C28 67.7(8) . . . . ?
C1 N1 C27 C29 5.7(9) . . . . ?
N2 N1 C27 C29 -177.6(6) . . . . ?
C1 N1 C27 C29B 176.7(6) . . . . ?
N2 N1 C27 C29B -6.5(8) . . . . ?
C30B C27 C28 C31 87.1(13) . . . . ?
C30 C27 C28 C31 -53.6(13) . . . . ?
N1 C27 C28 C31 -174.2(10) . . . . ?
C28B C27 C28 C31 15.6(17) . . . . ?
C29 C27 C28 C31 65.9(11) . . . . ?
C29B C27 C28 C31 -70.4(11) . . . . ?
C30B C27 C29 C33 -77.2(8) . . . . ?
C30 C27 C29 C33 60.4(9) . . . . ?
N1 C27 C29 C33 -177.3(5) . . . . ?
C28B C27 C29 C33 84.0(8) . . . . ?
C28 C27 C29 C33 -61.1(8) . . . . ?
C29B C27 C29 C33 15.6(13) . . . . ?
C30B C27 C30 C35 12.9(18) . . . . ?
N1 C27 C30 C35 175.9(9) . . . . ?
C28B C27 C30 C35 -82.2(11) . . . . ?
C28 C27 C30 C35 56.6(12) . . . . ?
C29 C27 C30 C35 -59.8(12) . . . . ?
C29B C27 C30 C35 79.0(11) . . . . ?
C27 C28 C31 C36 53.5(16) . . . . ?
C27 C28 C31 C32 -67.1(14) . . . . ?
C36 C31 C32 C33 -48.5(18) . . . . ?
C28 C31 C32 C33 70.2(15) . . . . ?
C31 C32 C33 C34 45.6(15) . . . . ?
C31 C32 C33 C29 -64.5(12) . . . . ?
C27 C29 C33 C32 59.6(10) . . . . ?
C27 C29 C33 C34 -61.8(11) . . . . ?
C32 C33 C34 C35 -46.8(15) . . . . ?
C29 C33 C34 C35 65.2(13) . . . . ?
C27 C30 C35 C36 -55.6(15) . . . . ?
C27 C30 C35 C34 60.1(15) . . . . ?
C33 C34 C35 C36 48.5(18) . . . . ?
C33 C34 C35 C30 -67.4(15) . . . . ?
C32 C31 C36 C35 56(2) . . . . ?
C28 C31 C36 C35 -60(2) . . . . ?
C30 C35 C36 C31 60.1(19) . . . . ?
C34 C35 C36 C31 -56(2) . . . . ?
C30B C27 C28B C31B -55.1(12) . . . . ?
C30 C27 C28B C31B 80.2(12) . . . . ?
N1 C27 C28B C31B -178.2(9) . . . . ?
C28 C27 C28B C31B -8.1(17) . . . . ?
C29 C27 C28B C31B -73.8(11) . . . . ?
C29B C27 C28B C31B 66.5(11) . . . . ?
C30B C27 C29B C33B 60.9(11) . . . . ?
C30 C27 C29B C33B -80.7(12) . . . . ?
N1 C27 C29B C33B 179.6(8) . . . . ?
C28B C27 C29B C33B -64.2(10) . . . . ?
C28 C27 C29B C33B 77.4(10) . . . . ?
C29 C27 C29B C33B -12.9(15) . . . . ?
C30 C27 C30B C35B -15.8(17) . . . . ?
N1 C27 C30B C35B -178.9(8) . . . . ?
C28B C27 C30B C35B 57.2(12) . . . . ?
C28 C27 C30B C35B -82.9(11) . . . . ?
C29 C27 C30B C35B 74.2(10) . . . . ?
C29B C27 C30B C35B -60.2(11) . . . . ?
C27 C28B C31B C32B -68.0(14) . . . . ?
C28B C31B C32B C33B 62.0(16) . . . . ?
C31B C32B C33B C29B -59.1(16) . . . . ?
C31B C32B C33B C34B 57.4(17) . . . . ?
C27 C29B C33B C32B 60.4(13) . . . . ?
C27 C29B C33B C34B -55.9(15) . . . . ?
C32B C33B C34B C35B -60.0(18) . . . . ?
C29B C33B C34B C35B 57.8(18) . . . . ?
C33B C34B C35B C30B -58.9(18) . . . . ?
C27 C30B C35B C34B 61.7(16) . . . . ?
 
# END of CIF
